# Supplementary material for: Surface modification of triboelectric materials by neutral beams
Source: Royal Society of Chemistry journal article supplement (doi:10.1039/c9ta09990e), 2019-01-01
Supplement: c9ta09990e1.pdf [file c9ta09990e1.pdf]

## Supplementary information

# Surface Modification of Triboelectric Materials by Neutral Beams

*Wook Kim<sup>a,†</sup>, Takeru Okada<sup>b,c,†</sup>, Hyun-Woo Park<sup>a</sup>, Jihye Kim<sup>d</sup>, Sungsoo Kim<sup>e</sup>, Sang-Woo Kim<sup>d</sup>,  
Seiji Samukawa<sup>b,f,\*</sup>, and Dukhyun Choi<sup>a,\*</sup>*

<sup>a</sup>Department of Mechanical Engineering, Kyung Hee University, 1732 Deogyong-daero, Giheung-gu, Yongin, Gyeonggi-do 17104, South Korea.

<sup>b</sup>Institute of Fluid Science, Tohoku University, 2-1-1 Katahira, Aoba-ku, Sendai 980-8577, Japan.

<sup>c</sup>Department of Electronic Engineering, Tohoku University, 6-6-05 Aramki-Aza, Aoba-ku, Sendai 980-8579, Japan.

<sup>d</sup>School of Advanced Materials Science & Engineering, 2066 Seobu-ro, Jangan-gu, Suwon, Gyeonggi-do 16419, South Korea.

<sup>e</sup>Department of Chemical Engineering, Kyung Hee University, 1732 Deogyong-daero, Giheung-gu, Yongin, Gyeonggi-do 17104, South Korea.

<sup>f</sup>Advanced Institute for Materials Research, Tohoku University, 2-1-1 Katahira, Aoba-ku, Sendai 980-8577, Japan.

\*Email address: samukawa@ifs.tohoku.ac.jp (S. Samukawa), dchoi@khu.ac.kr (D. Choi)

<sup>†</sup>*These authors equally contributed to this work.*

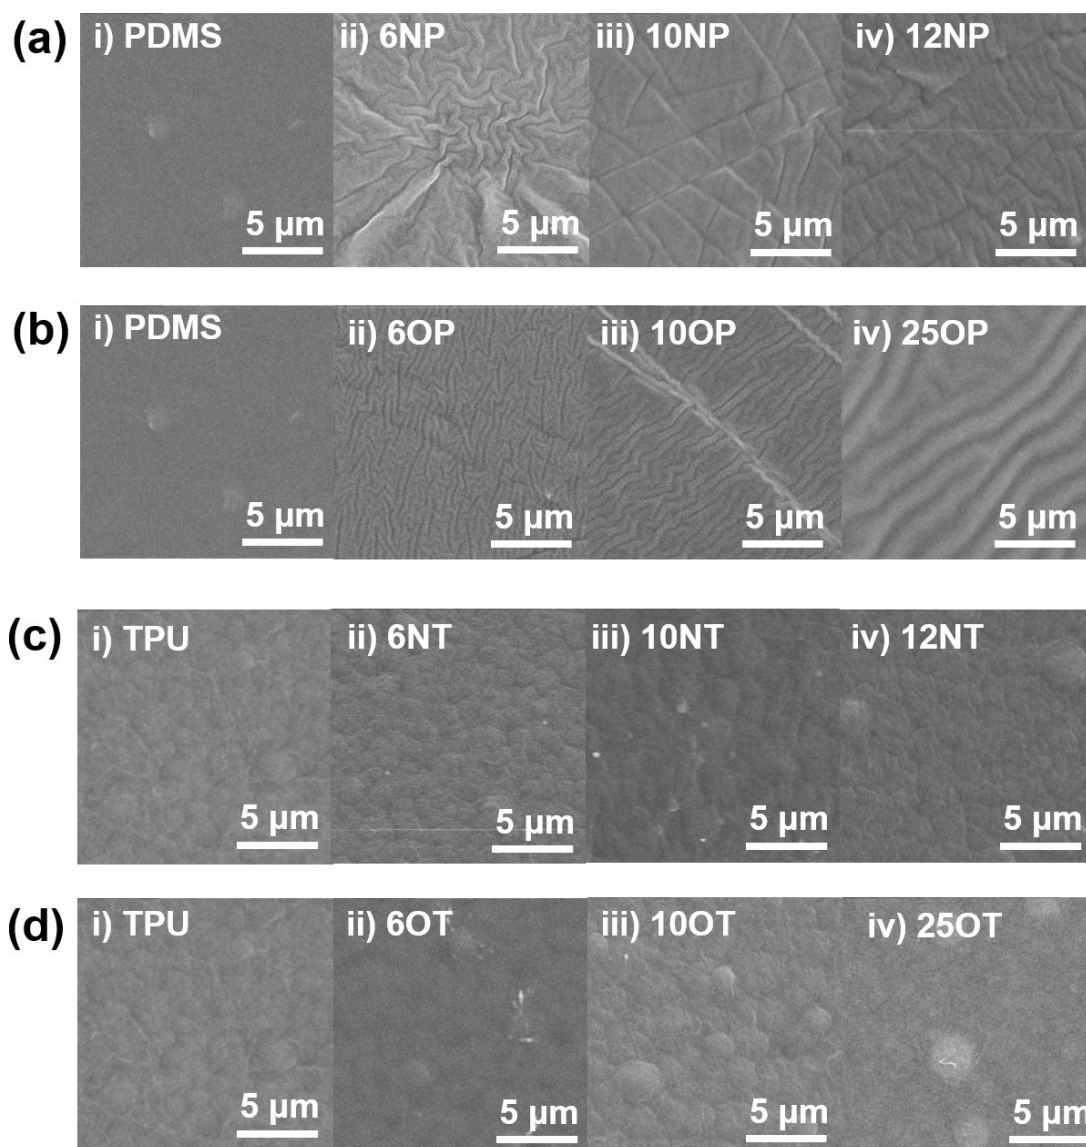

**Fig. S1.** SEM images of NB-treated PDMS and TPU samples. Surface morphology of (a) N-NB and (b) O-NB treated PDMS samples and (c) N-NB and (d) O-NB treated TPU samples.

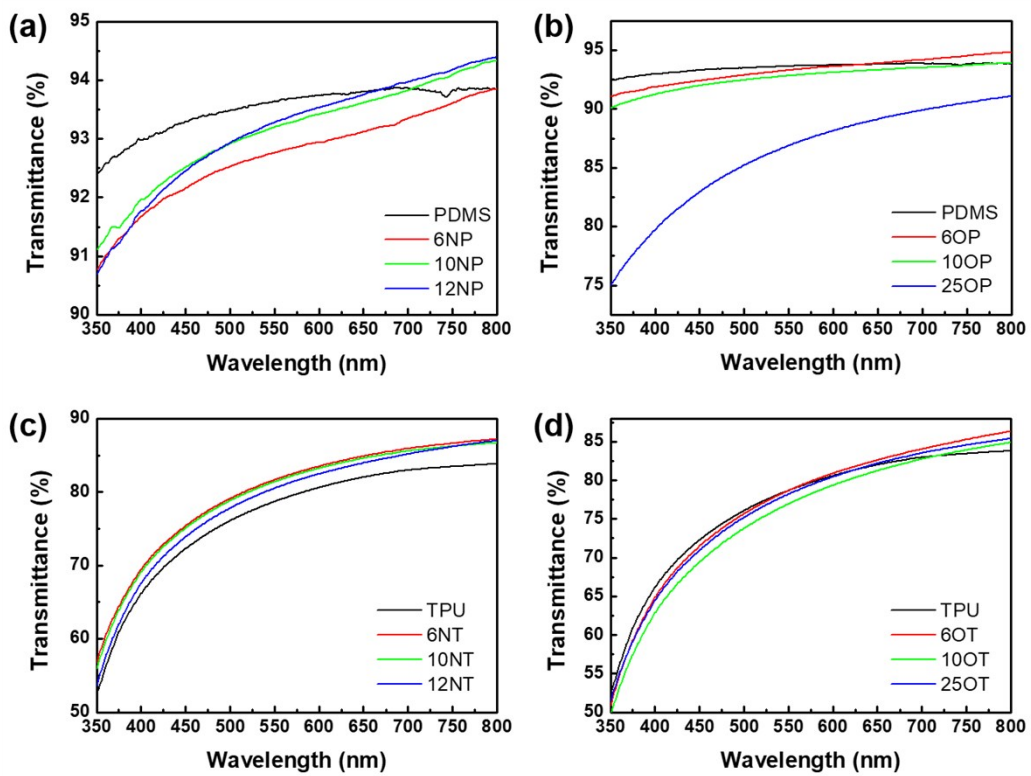

**Fig. S2.** Transmittance of NB-treated PDMSs and TPUs. Transmittance of PDMSs after (a) N-NB and (b) O-NB treatments. Optical transparency of TPUs after (c) N-NB and (d) O-NB treatments.

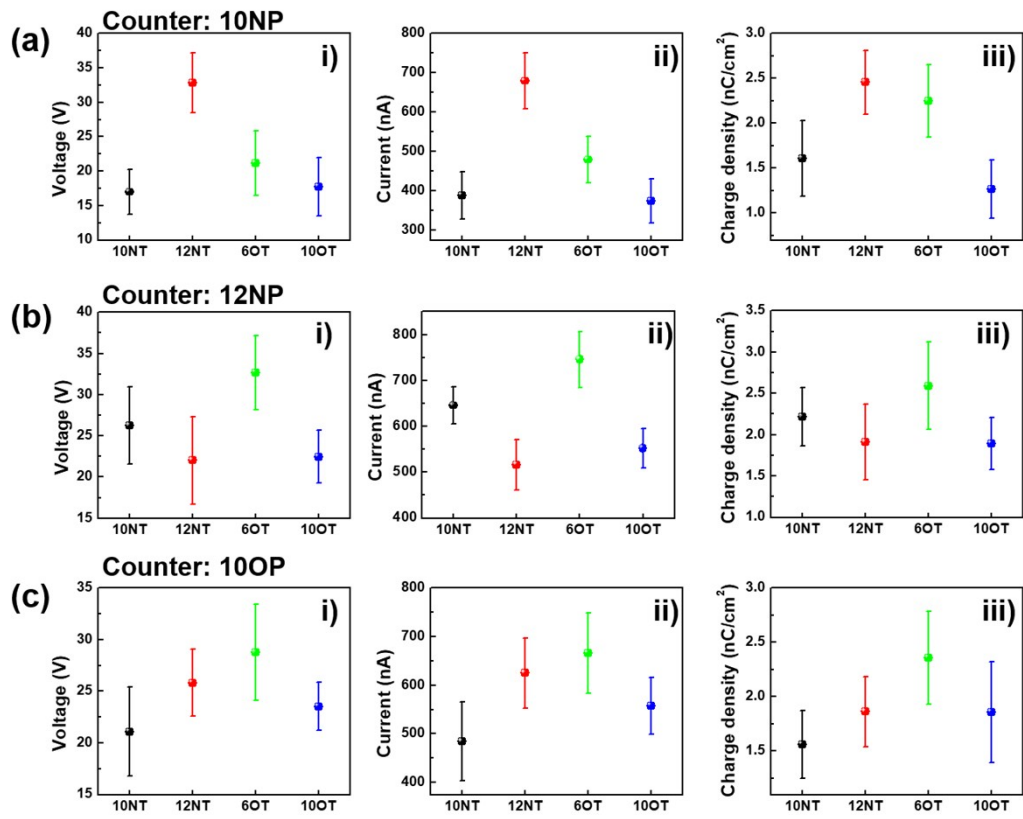

**Fig. S3.** Triboelectric performance of fully NB-treated TENGs with different counter triboelectric materials. (a) 10 NP, (b) 12 NP, and (c) 10OP; i) voltage, ii) current, and iii) charge density.

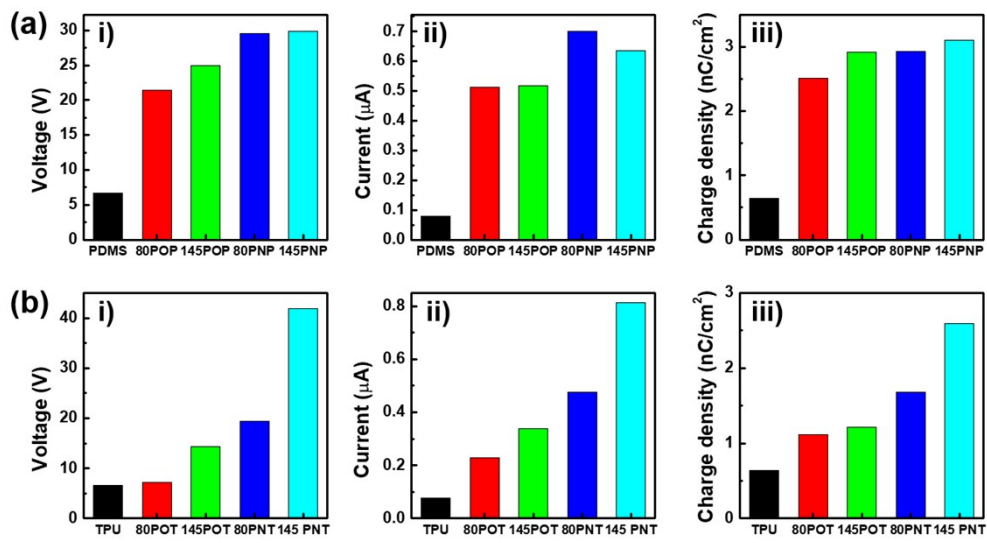

**Fig. S4.** Effect of oxygen and nitrogen ambient-based plasma on triboelectric characteristics. Triboelectric performance of plasma-treated (a) PDMS and (b) TPU in terms of i) voltage, ii) current, and iii) charge density.

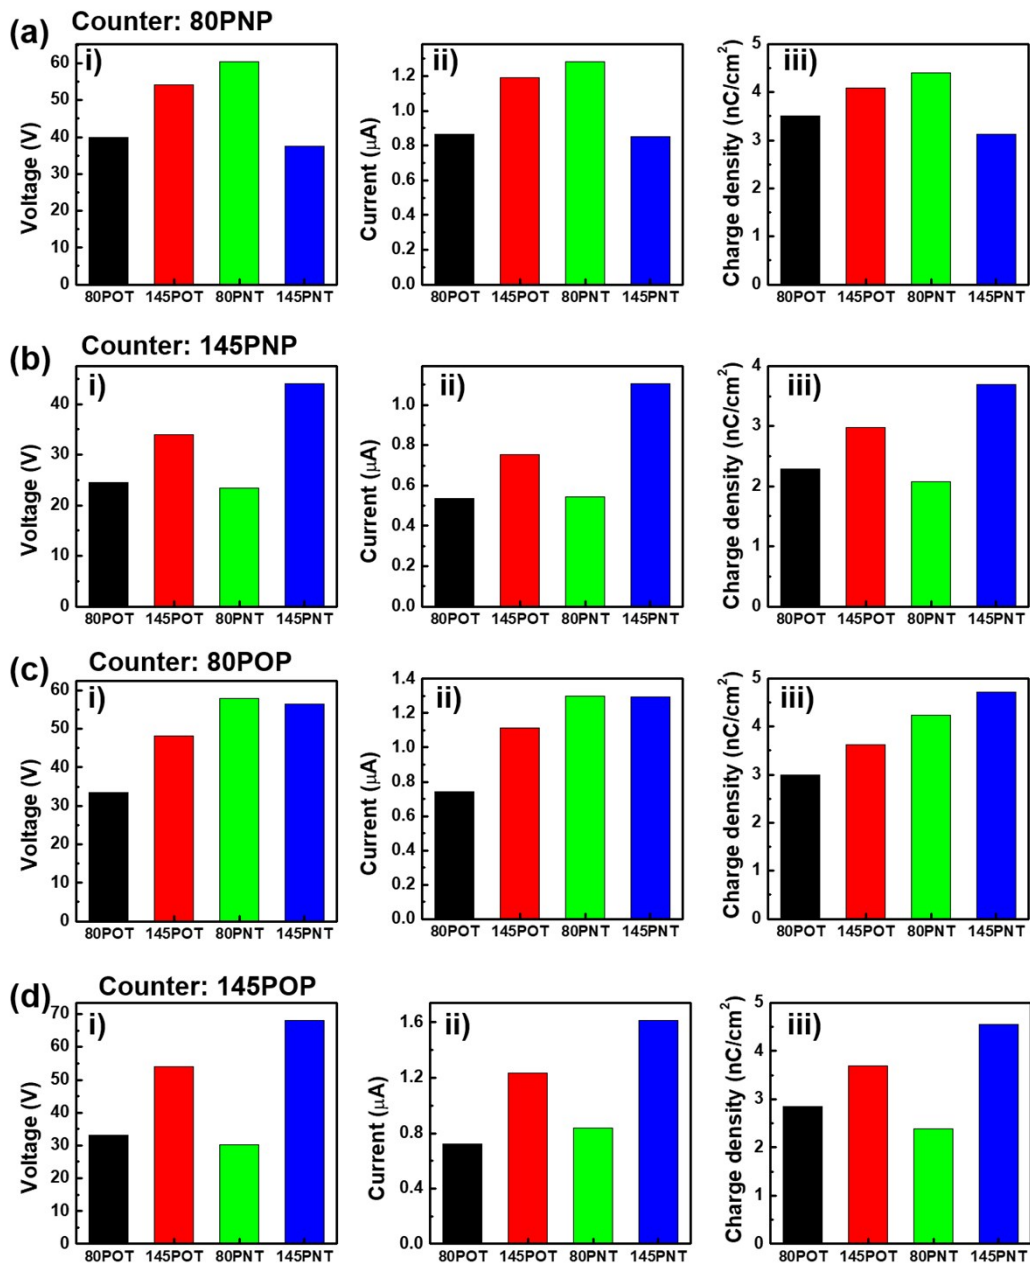

**Fig. S5.** Measured triboelectric performance of fully plasma-treated TENGs with various counter triboelectric materials. Triboelectric signals obtained when using (a) 80 PNP, (b) 145PNP, (c) 80POP, and (d) 145POP as the counter triboelectric material to 80POT, 145POT, 80PNT, and 145PNT.
